# Supplementary material for: ABHD15 regulates adipose tissue lipolysis and hepatic lipid accumulation
Source: PubMed Central journal article supplement (PMC6601125; doi:10.1016/j.molmet.2019.05.002), 2019-05-06
Supplement: mmc1.pdf [file mmc1.pdf]

Supplementary Table A

| Protein IDs                | Gene names | Chow_SC_1 | Chow_SC_2 | Chow_SC_3 | Chow_VIS_1 | Chow_VIS_2 | Chow_VIS_3 | WD_SC_1 | WD_SC_2 | WD_SC_3 | WD_VIS_1 | WD_VIS_2 | WD_VIS_3 |
|----------------------------|------------|-----------|-----------|-----------|------------|------------|------------|---------|---------|---------|----------|----------|----------|
| Q5F2F2;B6DQM2;F7C9J3;F6YMW | Abhd15     | 33.42     | 33.26     | 33.58     | 32.98      | 32.06      | 32.12      | 32.27   | 32.65   | 32.40   | 31.62    | 30.88    | 31.62    |
| Q61409;E9QLQ3              | Pde3b      | 32.78     | 32.63     | 32.42     | 32.19      | 32.24      | 32.37      | 32.00   | 31.97   | 31.59   | 31.07    | 31.23    | 30.73    |

Protein Intensity [log2]
